# Supplementary material for: Construction of hollow urchin-like carbon frameworks with Co, P, and N doping and encapsulated Co/Co2P heterojunction as bifunctional electrocatalysts for rechargeable Zn–air batteries
Source: Royal Society of Chemistry journal article supplement (doi:10.1039/d5nr00625b), 2025-01-01
Supplement: d5nr00625b1.pdf [file d5nr00625b1.pdf]

## **Construction of hollow urchin-like carbon frameworks with Co, P, N doping and encapsulated Co/Co<sub>2</sub>P heterojunction as bifunctional electrocatalysts for Zn-air batteries**

### **Experimental section**

**Synthesis of polystyrene (PS) spheres:** PS spheres were prepared by a previously reported method [1]. Typically, 20 mL of styrene and 20 mL of NaOH solution (1 mol L<sup>-1</sup>) were added into a separatory funnel. After adequate oscillation, the solution was left to rest for about 10 min until significant stratification was observed. The above process was repeated twice to obtain an initiator-free styrene. Then, the purified styrene, acrylic acid (0.4 g) and deionized water (150 mL) were added into a three-neck flask, and the mixture was stirred at 70 °C under N<sub>2</sub> atmosphere. Afterward, 10 mL of ammonium persulfate (APS, 0.1 mol L<sup>-1</sup>) was added and stirred for 24 h. Therewith, PS spheres were obtained after centrifugal separation, washing and drying at 80 °C in vacuum oven.

**Synthesis of HCoPNC:** The as-prepared PS@PDA-Co was heated to 600 °C at a rate of 5 °C min<sup>-1</sup> and kept for 2 h under N<sub>2</sub> atmosphere. After cooling to room temperature, the powder was collected (denoted as HCoNC). Then, 10 mg of the above powder and 200 mg of NaH<sub>2</sub>PO<sub>2</sub> were placed at the downstream and upstream of tube furnace at N<sub>2</sub> flow, respectively. Then, the tube furnace was heated to 500 °C at a rate of 3 °C min<sup>-1</sup> and kept at 500 °C for 6 h. After cooling to room temperature, the product was collected and named as HCoPNC.

**Synthesis of Co/CoP-PNCNTs:**  $\text{Co}(\text{NO}_3)_2 \cdot 6\text{H}_2\text{O}$  (174 mg), hexamethylenetetramine (70 mg) and trisodium citrate dihydrate (15 mg) were dissolved into the above solution under stirring. Afterward, the mixed solution was heated to 90 °C and stirred for 6 h at reflux. After cooling to room temperature, the precipitate ( $\text{Co}(\text{OH})_2$ ) was collected by centrifugal separation, washing and vacuum drying. Then, 20 mg of  $\text{Co}(\text{OH})_2$  and 800 mg of melamine were placed at the downstream and upstream of tube furnace, respectively. Then, the system was heated to 600 °C with a heating rate of 5 °C min<sup>-1</sup> under N<sub>2</sub> atmosphere and kept at 600 °C for 2 h. After cooling down to room temperature, the product was collected and named as Co-NCNTs. Then 10 mg of Co-NCNTs and 200 mg of  $\text{NaH}_2\text{PO}_2$  were placed at the downstream and upstream of tube furnace at N<sub>2</sub> flow, respectively. Then, the tube furnace was heated to 500 °C at a rate of 3 °C min<sup>-1</sup> and kept at 500 °C for 6 h. After cooling to room temperature, the product was collected and named as Co/CoP-PNCTs.

### ***Characterizations***

The morphological and structural characteristics of the materials were observed by scanning electron microscopy (SEM, HITACHI SU-8010) and transmission electron microscopy (TEM, FEI Tecnai G2 F20). X-ray diffraction (XRD) analysis was conducted on the X-ray diffractometer (Bruker D8 Advance). Raman spectra was recorded on a micro-Raman spectrometer (LabRAM HR800). X-ray photoelectron spectroscopy (XPS) analysis was performed on the ESCALAB 250Xi. N<sub>2</sub> adsorption/desorption isotherms was collected using Quantachrome Autosorb-IQ2-VP to obtain Brunauer-Emmett-Teller (BET) specific surface area and pore size.

### ***Electrochemical tests***

All electrochemical tests were performed on a typical three-electrode system with an electrochemical working station (CHI 700D/660E), where graphitic sheet and Hg/HgO electrode were used as counter electrode and reference electrode, respectively. All mentioned potential has been converted to the relative value vs. the reversible hydrogen electrode (RHE) based the following equation:

$$E(vs.RHE) = E^0(Ref) + E(vs.Ref) + 0.059 \times pH \text{ (S1)}$$

*Working electrode preparation:* 5 mg of catalyst and 50  $\mu\text{L}$  of Nafion solution (5%) were dispersed into 600  $\mu\text{L}$  of ethanol solution under ultrasonic treatment to prepare the ink. Then, a certain amount of the ink was dropped onto the surface of rotating disk electrode (RDE) or rotating ring-disk electrode (RRDE). After drying under room temperature, working electrode was obtained with a loading of 400  $\mu\text{g cm}^{-2}$ .

*ORR tests:* The catalyst was firstly activated by successive cyclic voltammograms (CVs) in  $\text{N}_2$ -saturated 0.1 M KOH at a sweep rate of 100  $\text{mV s}^{-1}$  between 0 and 1.2 V until steady curves were obtained. Then, stable CVs were recorded at a sweep rate of 50  $\text{mV s}^{-1}$  in  $\text{N}_2$  and  $\text{O}_2$  saturated electrolyte, respectively. Meanwhile, linear scan voltammogram (LSV) was obtained at a scan rate of 2  $\text{mV s}^{-1}$  from 0 to 1.2 V. The  $\text{H}_2\text{O}_2$  yield during ORR process was detected by RRDE technique, according to the following equation:

$$\eta_{\text{H}_2\text{O}_2} = 2 * \frac{I_{\text{R}}/N}{I_{\text{D}} + I_{\text{R}}/N} * 100\% \text{ (S2)}$$

Then, the electron transfer number ( $n$ ) was further determined based the following equation:

$$n = 4 * \frac{I_D}{I_D + I_R/N} \text{ (S3)}$$

Where,  $I_D$  is the disk current (mA),  $I_R$  is the ring current (mA),  $N$  is the collection coefficient of ring disk (0.424).

The stability was tested by continuous CVs for 5000 cycles at a rate of 50 mV s<sup>-1</sup> in O<sub>2</sub>-saturated 0.1 M KOH.

*OER tests:* The catalyst was first activated by continuous CV test at a sweep rate of 50 mV s<sup>-1</sup> between 1.0 and 1.8 V in O<sub>2</sub>-saturated 1.0 M KOH until steady curves were obtained. Then, LSV was conducted at a scan of 2 mV s<sup>-1</sup> from 1.0 to 1.8 V and then corrected by the resistance compensation ( $E-i \times R_u$ ). Meanwhile, electrochemical impedance spectroscopy (EIS) was conducted in the frequency range from 10<sup>6</sup> Hz to 0.01 Hz with an amplitude of 5 mV at a potential of 1.575 V vs. RHE. To evaluate the electrical double layered capacitance ( $C_{dl}$ ), CV curves were recorded in a non-Faradic region (1.07-1.12 V) at different scan rates (20-100 mV s<sup>-1</sup>). Then, the capacitive current densities of  $\Delta j_{|a-jc|}@1.095V/2$  were plotted as a function of the CV scan rates. The stability was evaluated via chronopotentiometry test at an oxidized current density of 10 mA cm<sup>-2</sup> using carbon cloth as the substrate.

### ***Zn-battery tests***

The prepared catalyst ink was dropped on the carbon cloth coated with a gas diffusion layer to prepare the air electrode with a catalyst loading of 1.0 mg cm<sup>-2</sup>. The aqueous Zn-air battery was assembled with the air electrode, Zn-plate anode and the electrolyte. For the primary battery, 6 M KOH solution was used as the electrolyte, while a mixed solution containing 6 M KOH and 0.2 M zinc acetate served as the

electrolyte for rechargeable battery.

The charge and discharge performances were collected on an electrochemical working station (CHI 660E), and the cycling stability was performed using LAND testing system.

### **DFT calculations**

All DFT calculations were carried out using ORCA (version: 5.0.3) [2-4]. Geometry optimization was conducted at the r2SCAN-3c level of theory [5-7]. The single point calculations for the optimized geometries were performed to obtain accurate energies at the  $\omega$ B97X-V/def2-TZVP level of theory [8, 9]. The solvent effect of water evaluated by the CPCM solvation model [10]. The RIJCOSX approximation was applied with the def2/J auxiliary basis set [11, 12]. The Gibbs free energies were included in the Gibbs energy correction of unscaled vibrational analysis at the r2SCAN-3c level of theory. Electron density difference and density of electronic states were analyzed with MULTIWFN [13, 14], and the results were visualized with VMD software [15].

## Results

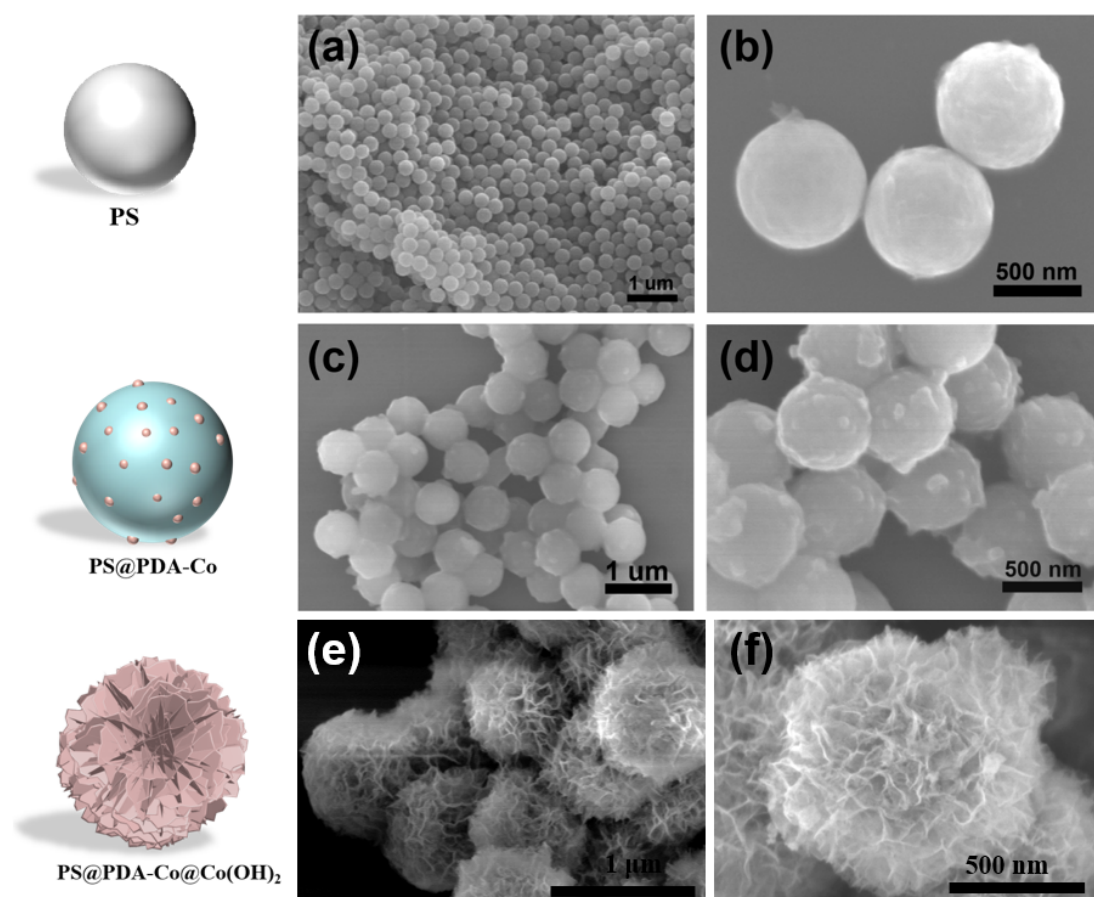

**Fig. S1** SEM images of (a, b) PS spheres, (c, d) PS@PDA-Co and (e, f) PS@PDA-Co@Co(OH)<sub>2</sub>.

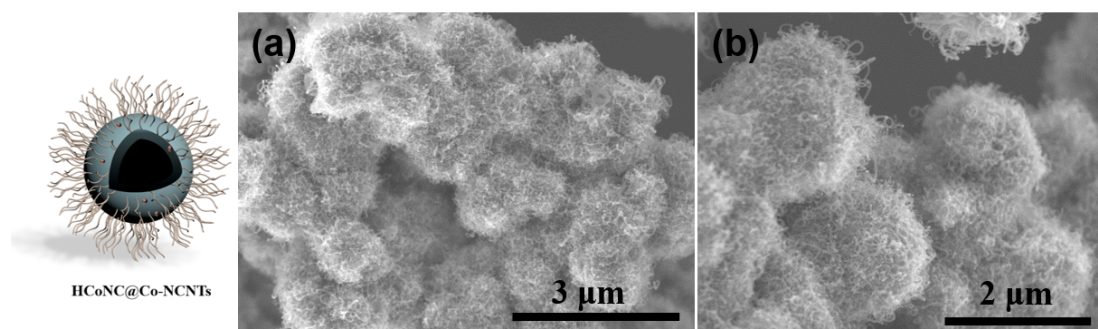

**Fig. S2** SEM images of HCoNC@Co-NCNTs.

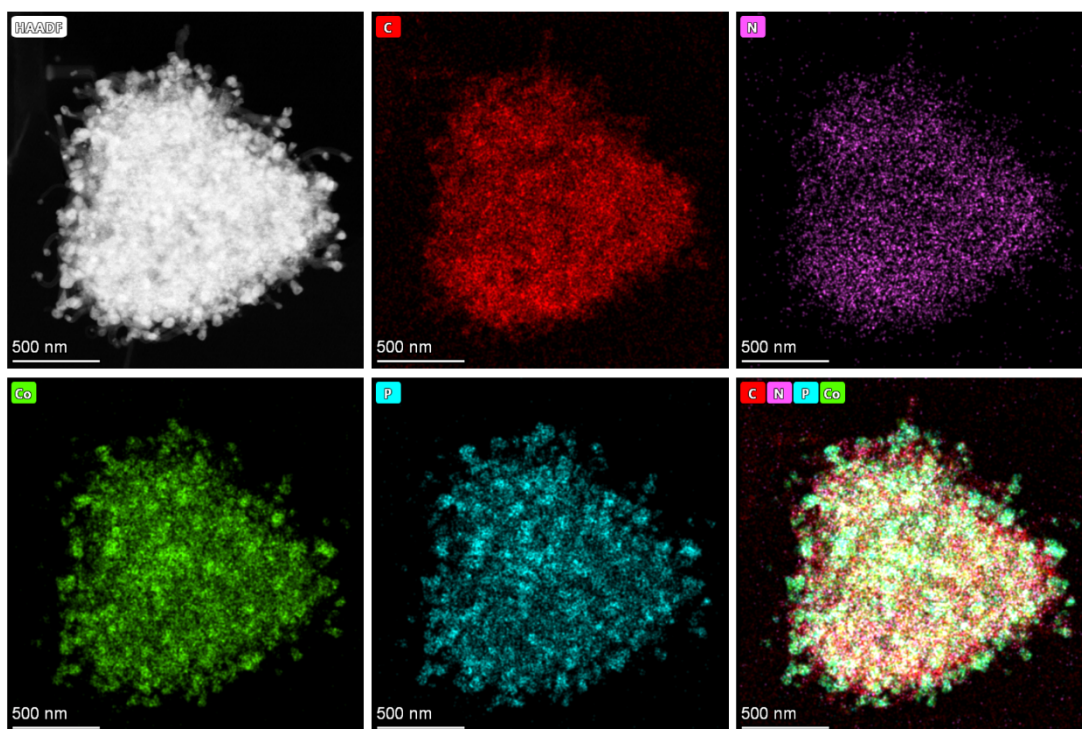

**Fig.S3** HADDF-STEM and corresponding EDX elemental mapping images.

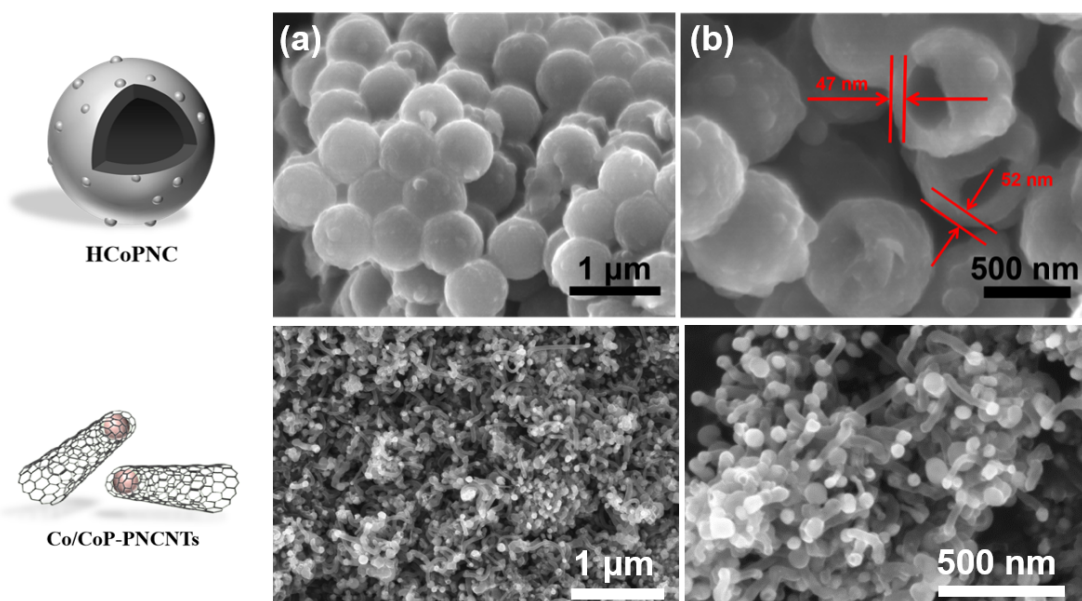

**Fig. S4** SEM images of (a, b) HCoPNC, (c, d) Co/CoP-PNCNTs.

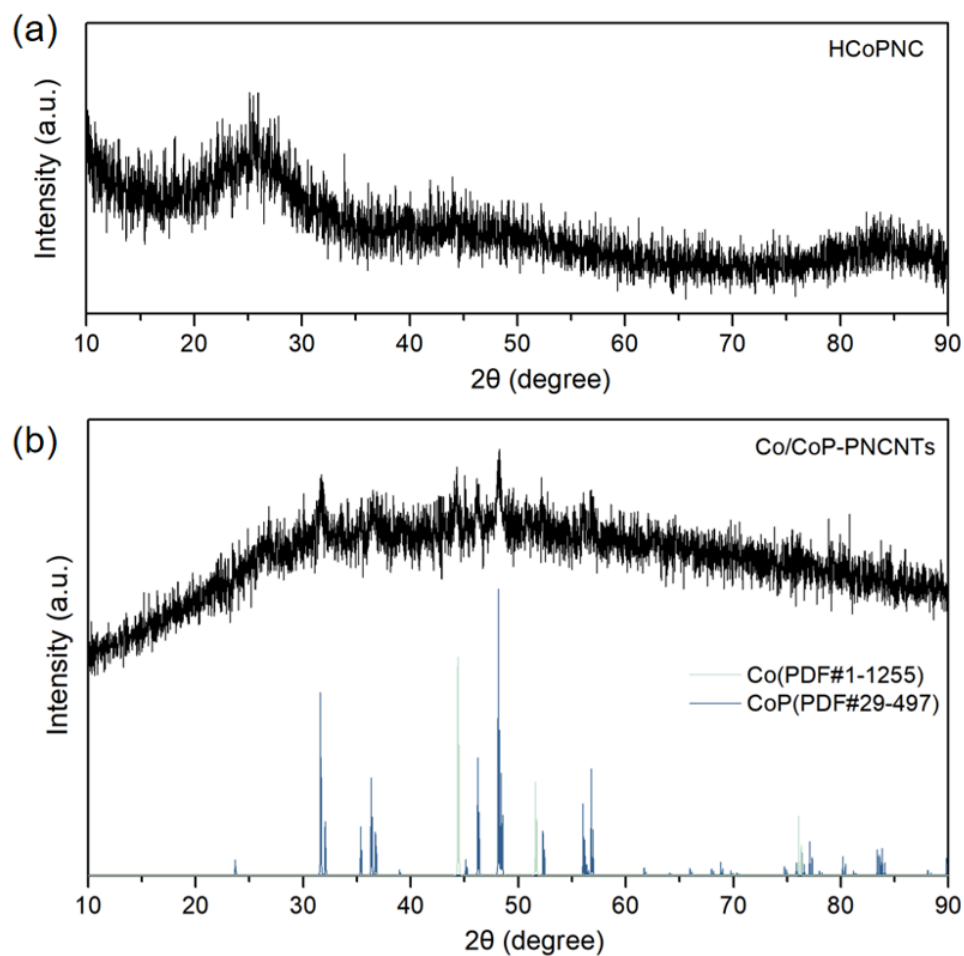

**Fig. S5** The XRD patterns of (a) HCoPNC and (b) Co/CoP-PNCNTs.

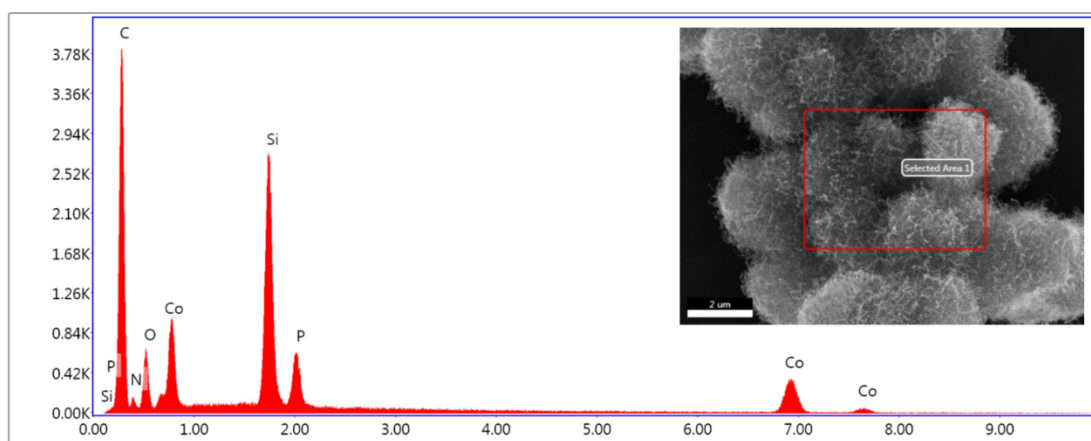

**Fig. S6** The EDS of HCoPNC@Co/Co<sub>2</sub>P-PNCNTs.



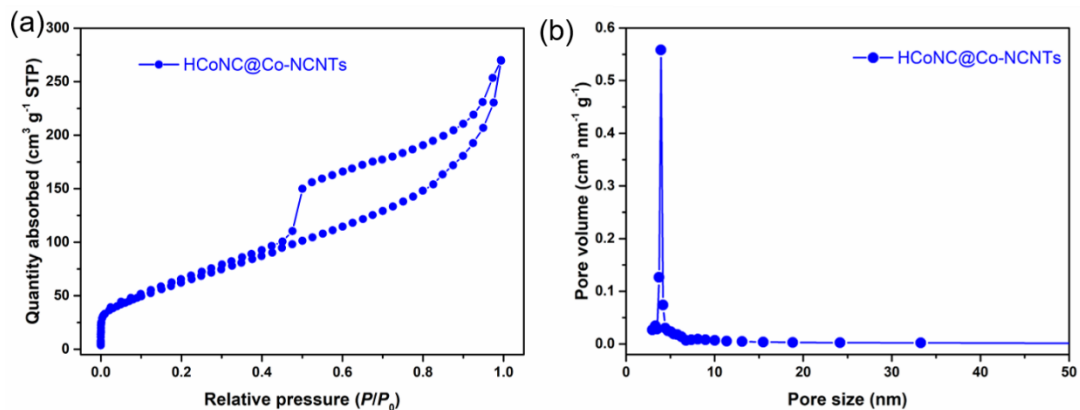

**Fig. S7** (a) The  $N_2$  absorption/desorption isothermal and (b) pore-size distribution curve of HCoNC@Co-NCNTs.

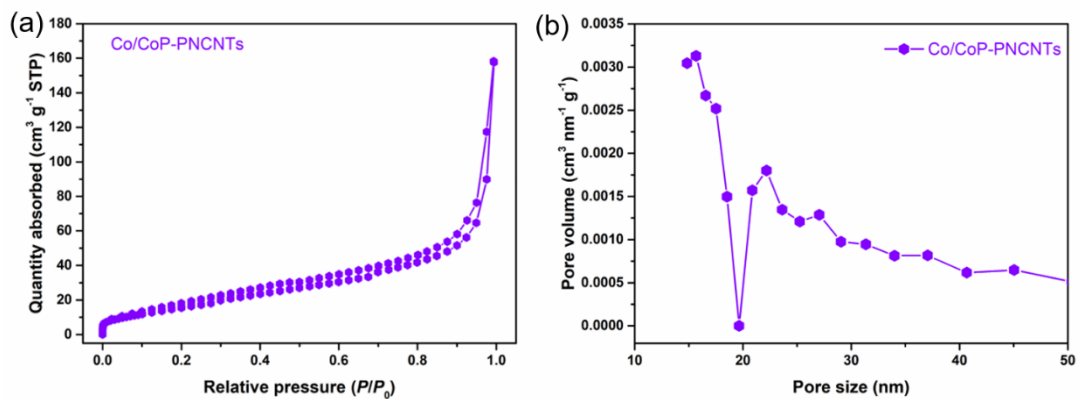

**Fig. S8** (a) The  $N_2$  absorption/desorption isothermal and (b) pore-size distribution curve of Co/CoP-PNCNTs.

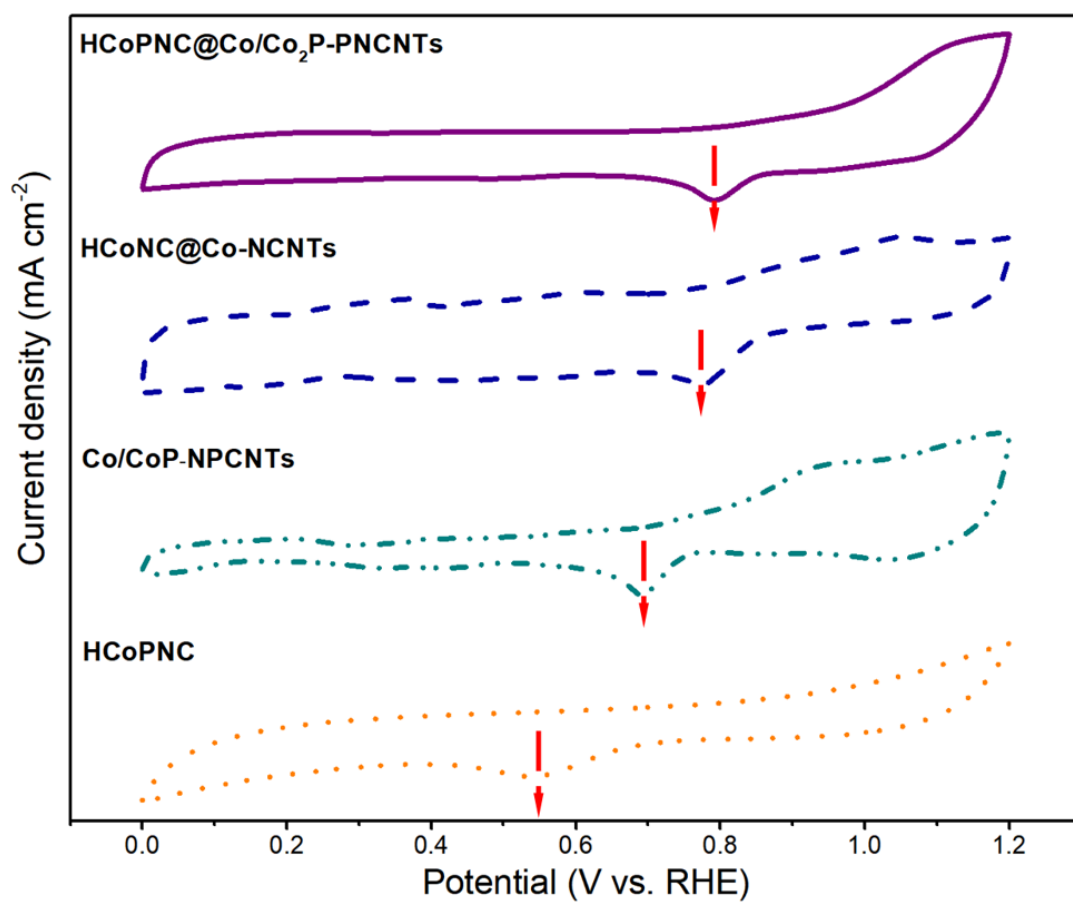

**Fig. S9** CV curves of different catalysts in  $O_2$ -saturated 0.1 M KOH.

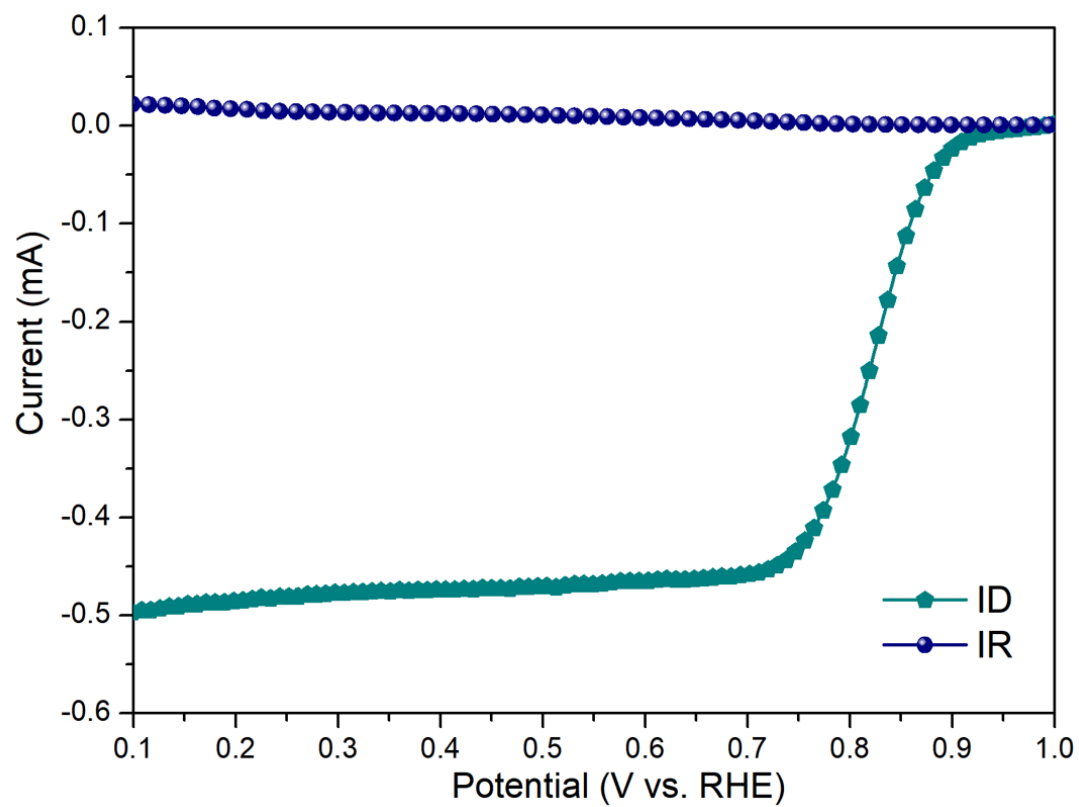

**Fig. S10** LSV curves of HCoPNC@Co/Co<sub>2</sub>P-PNCNTs measured by RRDE in O<sub>2</sub>-saturated 0.1 M KOH.

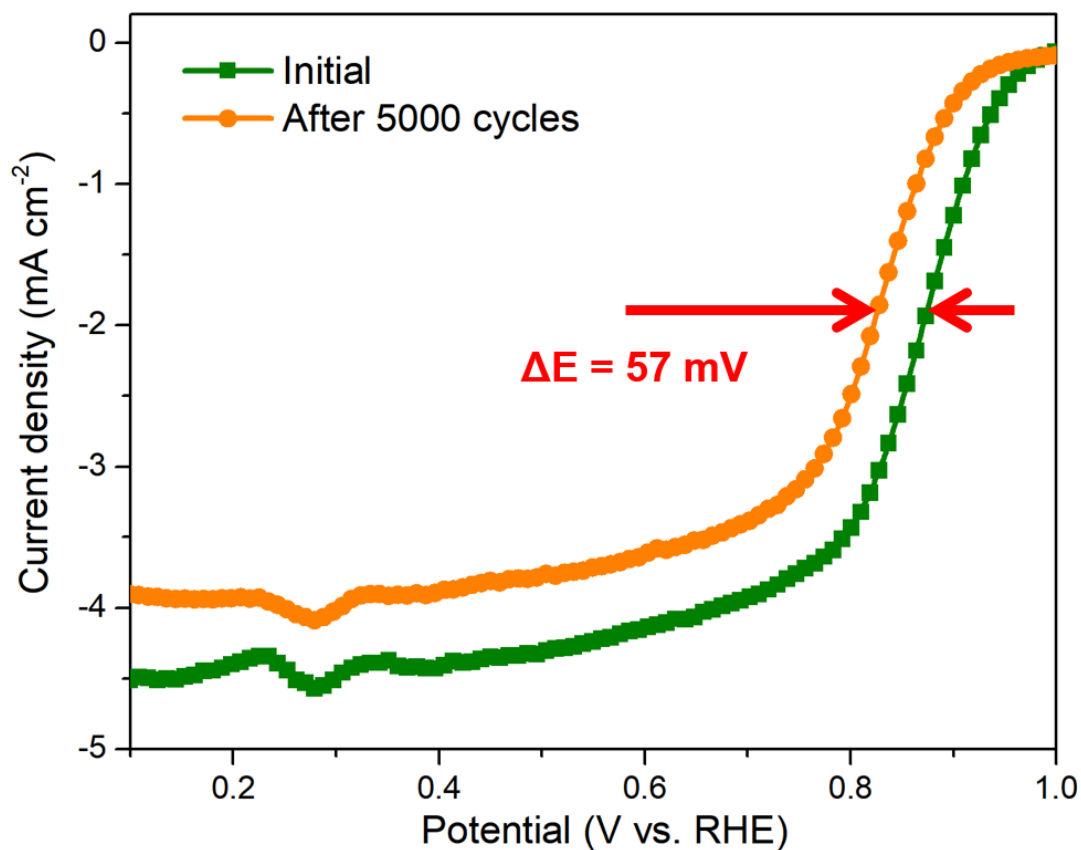

**Fig. S11** ORR polarization curves of Pt/C before and after stability test.

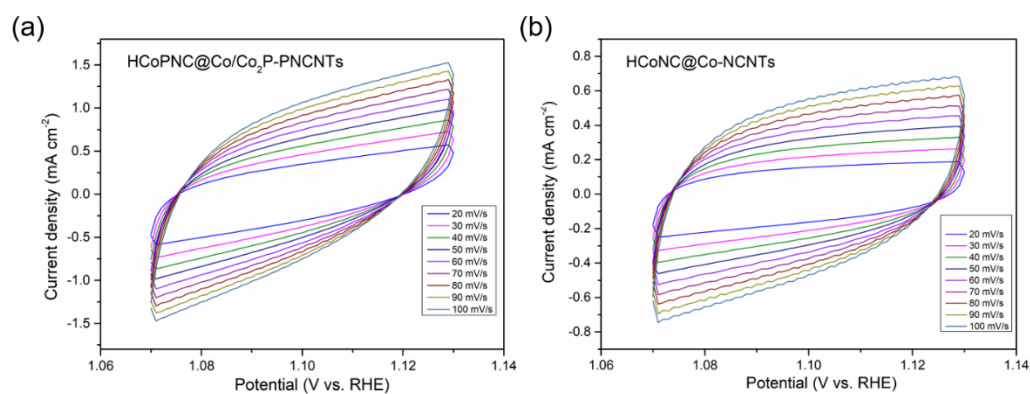

**Fig. S12** (a) The CV curves at different scan rates of HCoPNC@Co/Co<sub>2</sub>P-PNCNTs;

(b) The CV curves at different scan rates of HCoNC@Co-NCNTs

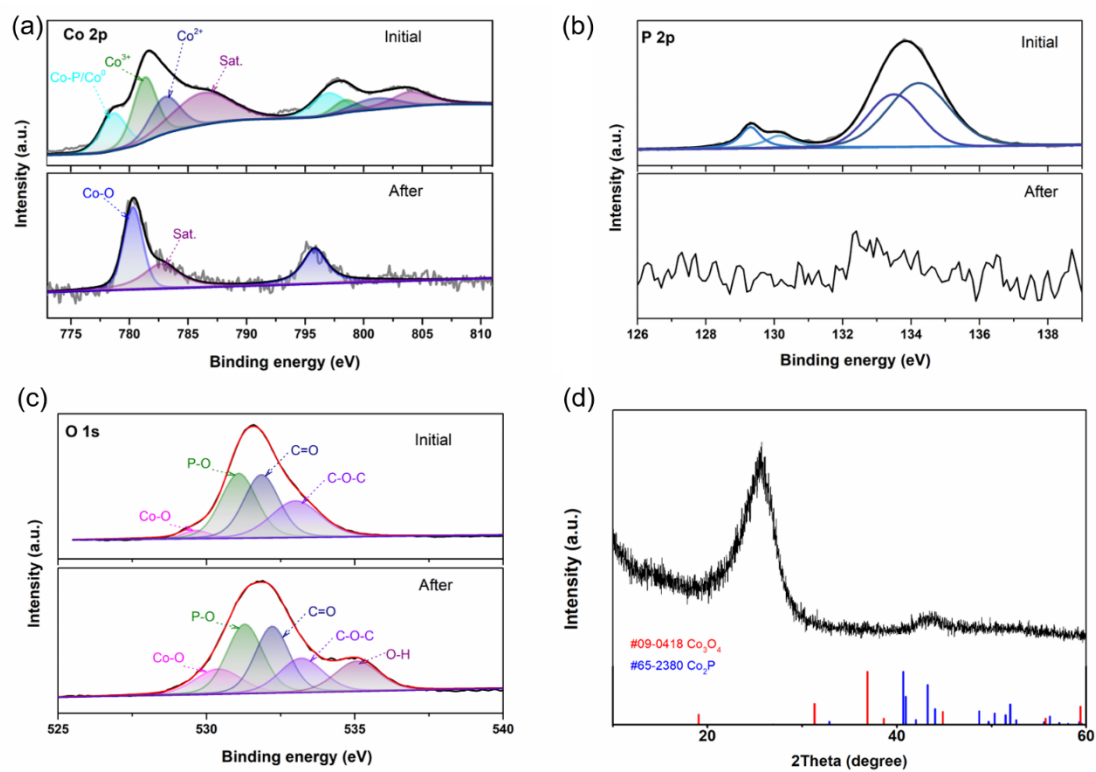

**Fig. S13** (a-c) XPS spectra and (d) XRD pattern of HCoPNC@Co/Co<sub>2</sub>P-PNCNTs after the OER stability test.

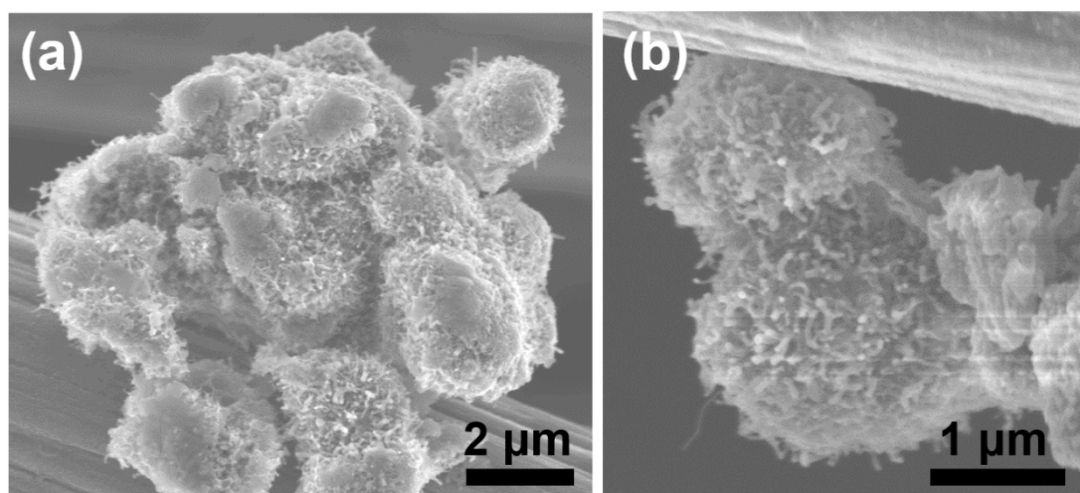

**Fig. S14** (a-b) SEM images of HCoPNC@Co/Co<sub>2</sub>P-PNCNTs after stability test.

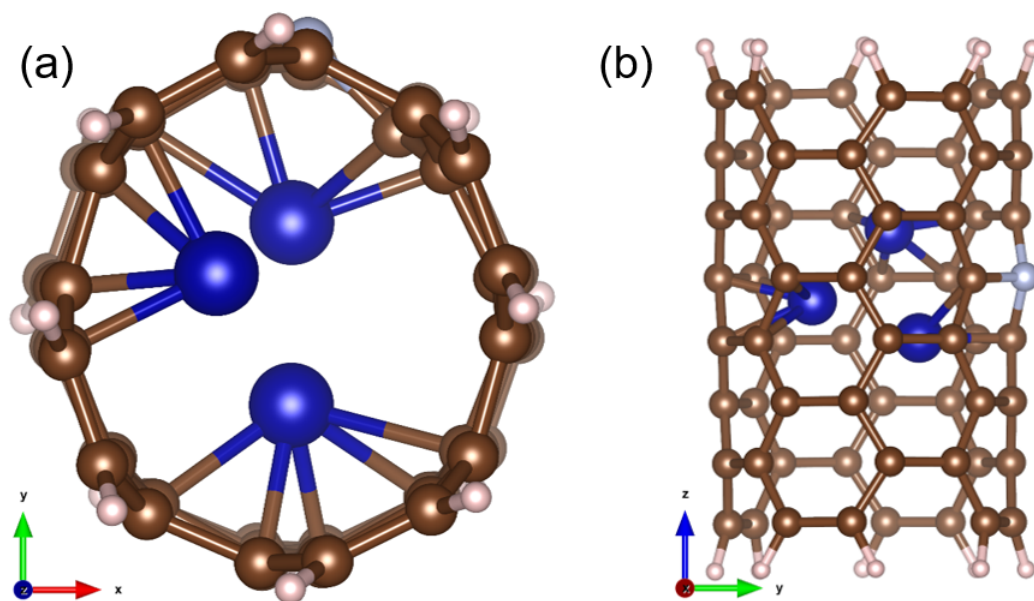

**Fig. S15** The optimized geometry of Co@NCNTs.

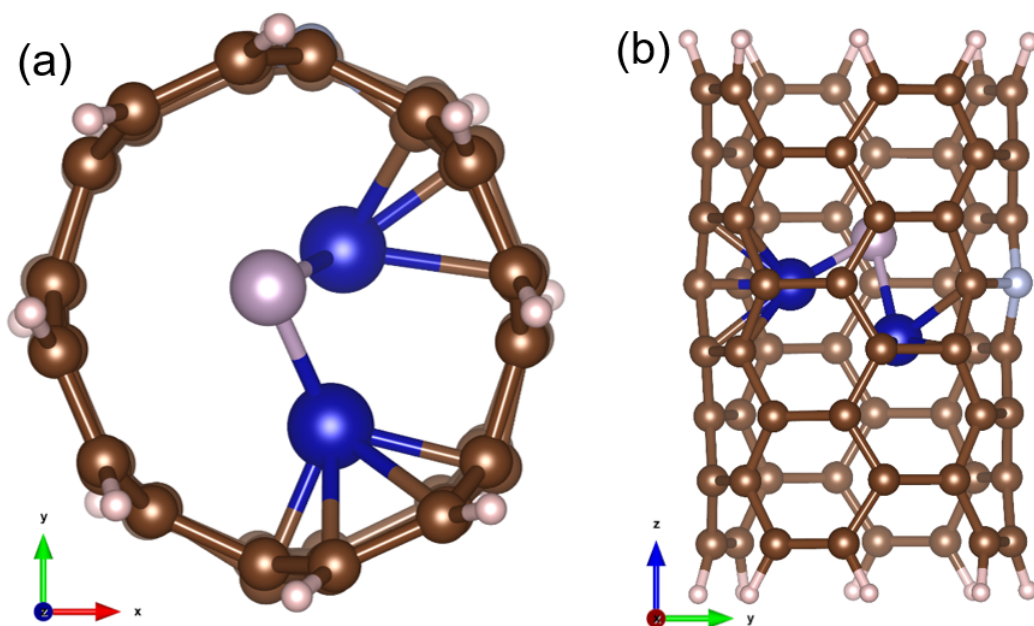

**Fig. S16** The optimized geometry of Co<sub>2</sub>P@NCNTs.

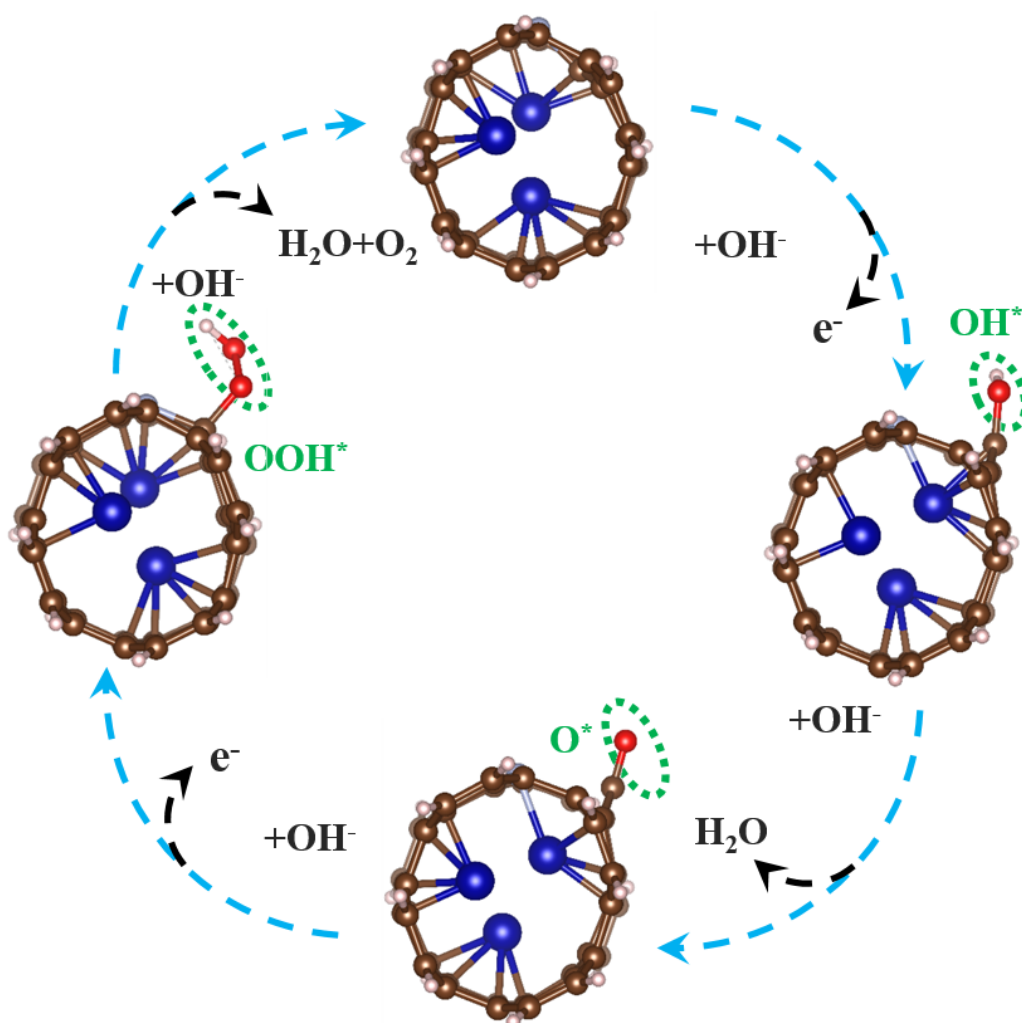

**Fig. S17** The optimized geometric configurations of  $\text{OH}^*$ ,  $\text{O}^*$  and  $\text{OOH}^*$  in Co@NCNTs.

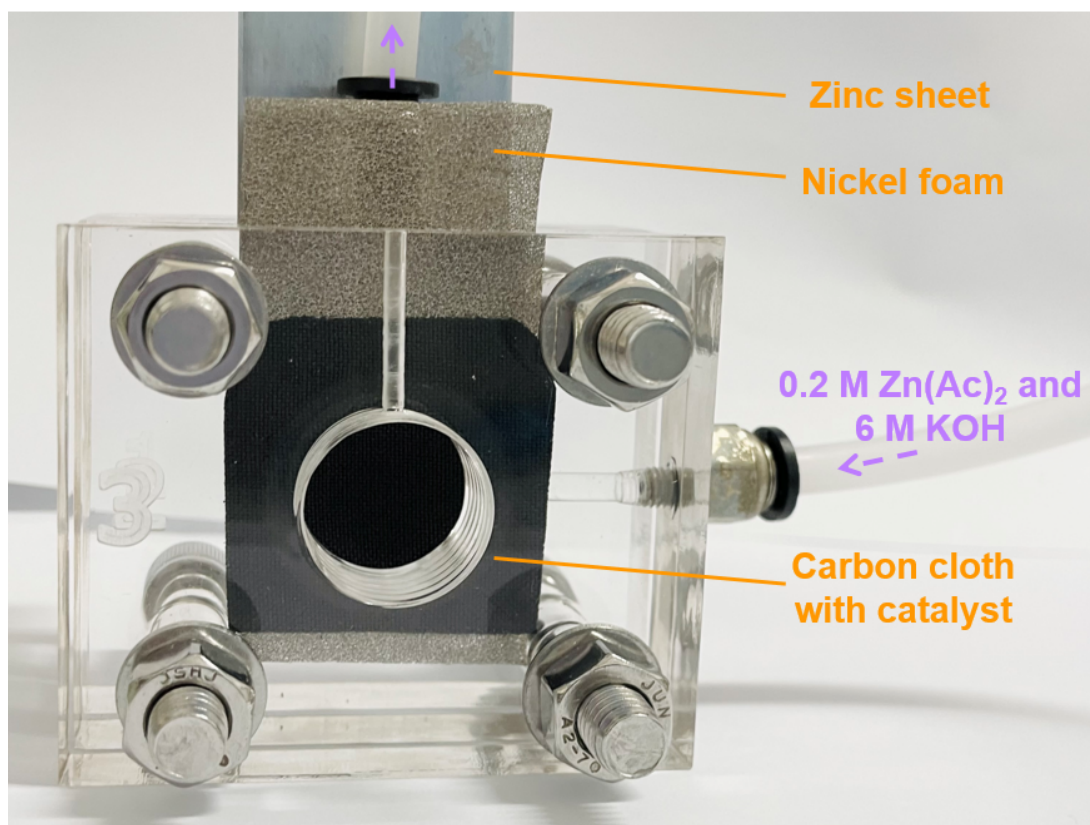

**Fig. S18** The digital image of home-made ZAB.

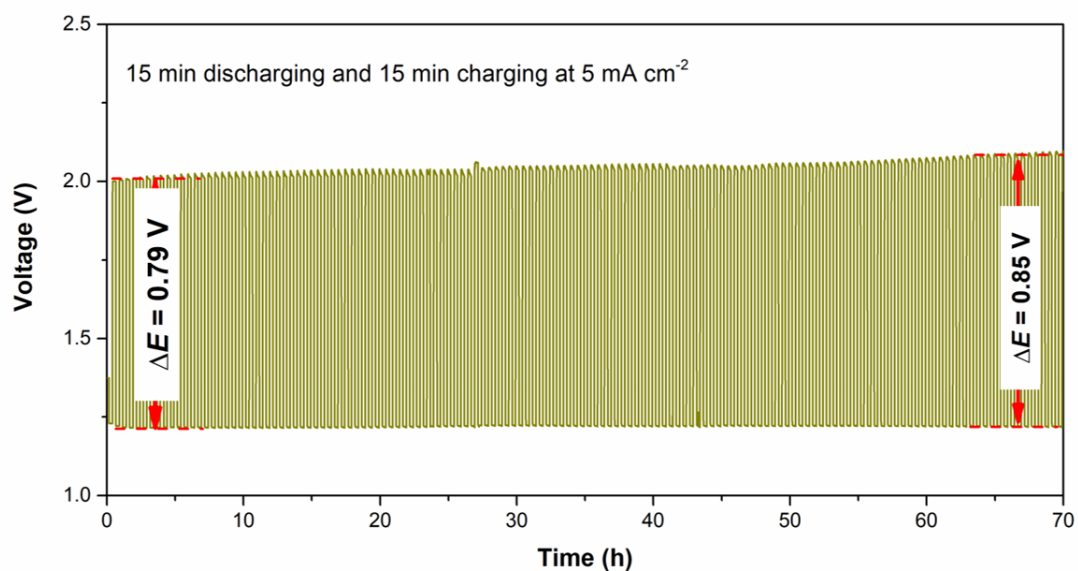

**Fig. S19** The discharge/charge cycling stability of HCoPNC@Co/Co<sub>2</sub>P-PNCNTs - based ZAB at 5 mA cm<sup>-2</sup>.



**Table S1** Comparison of the ORR, OER and ZAB performances of our catalyst with that in the literature.

| Catalysts                              | $E_{1/2}$ (V vs.<br>RHE) in 0.1 M<br>KOH | $E_{j=10}$ (V vs.<br>RHE) in 1.0 M<br>KOH | Bifunctional<br>activity<br>( $\Delta E$ , V) | Peak power<br>density<br>(mW cm <sup>-2</sup> ) | Cycling stability          | Ref.                                     |
|----------------------------------------|------------------------------------------|-------------------------------------------|-----------------------------------------------|-------------------------------------------------|----------------------------|------------------------------------------|
| HCoPNC@Co/Co <sub>2</sub> P-<br>PNCNTs | 0.83                                     | 1.58                                      | 0.75                                          | 250                                             | 110h@5mA cm <sup>-2</sup>  | This work                                |
| Co/Co <sub>2</sub> P@NPSC-3            | 0.86                                     | 1.555                                     | 0.695                                         | 198.1                                           | 50h@10mA cm <sup>-2</sup>  | ChemElectroChem, 8 (2021)<br>4286–4295   |
| Co <sub>2</sub> P/CoN-in-NCNTs         | 0.85                                     | 1.65                                      | 0.8                                           | 194.6                                           | 96h@5mA cm <sup>-2</sup>   | Adv. Funct. Mater., 28 (2018)<br>1805641 |
| Fe-Co <sub>2</sub> P/Co@NC             | 0.876                                    | 1.497                                     | 0.621                                         | 217                                             | 155h@10mA cm <sup>-2</sup> | Chem. Eng. J., 470 (2023)<br>144380      |

|                                   |       |       |       |       |                                    |                                              |
|-----------------------------------|-------|-------|-------|-------|------------------------------------|----------------------------------------------|
| <b>Co<sub>2</sub>P/H-NPC</b>      | 0.83  | 1.62  | 0.79  | 120   | 300h@2mA cm <sup>-2</sup>          | J. Energy Storage, 81 (2024)<br>110440       |
| <b>Co<sub>2</sub>P@NPPC</b>       | 0.85  | 1.55  | 0.7   | 226   | 160h@10mA cm <sup>-2</sup>         | Catal. Sci. Technol., 13 (2023)<br>3084–3093 |
| <b>Co<sub>2</sub>N/CoP@PNCNTs</b> | 0.85  | 1.559 | 0.709 | 151.1 | 150h@10mA cm <sup>-2</sup>         | Small, 18 (2022) 2108094                     |
| <b>Mn(0.1)-Co<sub>2</sub>P/NC</b> | 0.784 | 1.6   | 0.816 | 40.44 | 100cycles@10mA<br>cm <sup>-2</sup> | Mater. Res. Bull., 147 (2022)<br>111638      |
| <b>Co<sub>2</sub>P@NPC</b>        | 0.82  | 1.55  | 0.73  | 157   | 140h@10mA cm <sup>-2</sup>         | Energy Environ. Mater., 5 (2022)<br>515-523  |
| <b>Fe-Co<sub>2</sub>P@NPDC</b>    | 0.895 | 1.55  | 0.655 | 340   | 83h@1mA cm <sup>-2</sup>           | J. Mater. Chem. A, 10 (2022)<br>21659–21671  |

|                                                                             |       |       |       |     |                                   |                                                |
|-----------------------------------------------------------------------------|-------|-------|-------|-----|-----------------------------------|------------------------------------------------|
| <b>FeCo/FeCoP@NMn-CNS</b>                                                   | 0.84  | 1.555 | 0.715 | 135 | 200h@5mA cm <sup>-2</sup>         | J. Colloid Interf. Sci., 605 (2022)<br>451–462 |
| <b>CoC<sub>x</sub>/(Co<sub>0.55</sub>Fe<sub>1.945</sub>)<sub>2</sub>P@C</b> | 0.84  | 1.62  | 0.78  | 131 | 60cycles@5mA cm <sup>-2</sup>     | J. Colloid Interf. Sci., 590 (2021)<br>321–329 |
| <b>Co<sub>2</sub>P/CoNPC</b>                                                | 0.843 | 1.556 | 0.713 | 116 | 60h@10mA cm <sup>-2</sup>         | Adv. Mater., (2020) 2003649                    |
| <b>CoP–DC</b>                                                               | 0.81  | 1.55  | 0.74  | -   | -                                 | Adv. Energy Mater., 8 (2018)<br>1703623        |
| <b>CoP@mNSP-C</b>                                                           | 0.9   | 1.64  | 0.74  | -   | 450h@1mA cm <sup>-2</sup>         | Small, (2017) 1702068                          |
| <b>Co/CoP–HNC</b>                                                           | 0.83  | 1.53  | 0.7   | -   | 100cycles@5mA<br>cm <sup>-2</sup> | Mater. Horiz., 5 (2018) 108-115                |

|                              |       |                     |       |       |                            |                                                       |
|------------------------------|-------|---------------------|-------|-------|----------------------------|-------------------------------------------------------|
| <b>Co-Co<sub>2</sub>P@NC</b> | 0.858 | 1.598               | 0.74  | 120   | 2000h@2mA cm <sup>-2</sup> | J. Alloy. Compd., 908 (2022)<br>164595                |
| <b>FeCoP/NPC</b>             | 0.855 | 1.61                | 0.755 | 136   | 1650h@2mA cm <sup>-2</sup> | Nanoscale, 14 (2022) 12431–<br>12436                  |
| <b>CNCP-450</b>              | 0.78  | 1.514               | 0.734 | 178   | 50h@10mA cm <sup>-2</sup>  | Energy Technol., (2021)<br>2100940                    |
| <b>CoFeP@C</b>               | 0.8   | 1.566               | 0.766 | 143.5 | 200h@2mA cm <sup>-2</sup>  | ACS Appl. Mater. Interfaces, 13<br>(2021) 22282–22291 |
| <b>CoP NPs/CNSs</b>          | 0.91  | 1.57                | 0.66  | -     | -                          | RSC Adv., 9 (2019) 39951–<br>39957                    |
| <b>Co-NC@CoP-NC</b>          | 0.78  | 1.56 (0.1 M<br>KOH) | 0.78  | -     | -                          | J. Mater. Chem. A, 4 (2016)<br>15836–15840            |

|                                                        |      |       |       |       |                             |                                               |
|--------------------------------------------------------|------|-------|-------|-------|-----------------------------|-----------------------------------------------|
| <b>CoP/NP-HPC</b>                                      | 0.83 | ~1.84 | 1.01  | 186   | 80h@2mA cm <sup>-2</sup>    | J. Mater. Chem. A, 8<br>(2020)19043-19049     |
| <b>Cu<sub>3</sub>P/CoP@NC</b>                          | 0.82 | -     | -     | 209   | 317h@5mA cm <sup>-2</sup>   | ACS Nano, 18 (2024) 17901-<br>17912           |
| <b>Zn/CoP</b>                                          | -    | 1.574 | -     | 93.6  | 66h@5mA cm <sup>-2</sup>    | Int. J. Electrochem. Sc., 18<br>(2023) 100153 |
| <b>CoP/Co<sub>2</sub>P/Co<sub>3</sub>O<sub>4</sub></b> | 0.89 | 1.505 | 0.615 | 64.43 | 33.3h@10mA cm <sup>-2</sup> | New J. Chem., 46 (2022) 8786-<br>8793         |

## References

- [1] H. Lv, S. Wang, Z. Xiao, C. Qin, S. Zhai, G. Wang, Z. Zhao, Q. An, J. Power Sources, 2021, 493, 229679.
- [2] F. Neese, Wiley Interdiscip. Rev.: Comput. Mol. Sci. 2012, 2, 73–78.
- [3] F. Neese, Wiley Interdiscip. Rev.: Comput. Mol. Sci. 2018, 8, e1327.
- [4] F. Neese, Wiley Interdiscip. Rev.: Comput. Mol. Sci. 2022, 12, e1606.
- [5] S. Grimme, A. Hansen, S. Ehlert, J.-M. Mewes, J. Chem. Phys. 2021, 154, 064103.
- [6] M. Gawron, F. Gilch, D. Schmidhuber, J. A. Kelly, T. M. Horsley Downie, A. J. Wangelin, J. Rehbein, Robert Wolf, Angew. Chem. 2024, 63, e202315381.
- [7] J. Malenfant, L. Kuster, Y. Gagné, K. Signo, M. Denis, S. Canesi, M. Frenette, Chem. Sci., 2024, 15, 701-709.
- [8] N. Mardirossian, M. Head-Gordon, Phys. Chem. Chem. Phys., 2014, 16, 9904-9924.
- [9] N. Mardirossian, M. J. Head-Gordon, Chem. Phys., 2016, 144, 214110.
- [10] A. V. Marenich, C. J. Cramer, D. G. Truhlar, J. Phys. Chem. B, 2009, 113, 6378-6396.
- [11] F. Neese, F. Wennmohs, A. Hansen, U. Becker, J. Chem. Phys., 2009, 356, 98-109.
- [12] F. Weigend, Phys. Chem. Chem. Phys., 2006, 8, 1057-1065.
- [13] T. Lu, F. W. Chen, J. Comput. Chem., 2012, 33, 580-592.
- [14] T. Lu, J. Chem. Phys., 2024, 161, 082503.
- [15] W. Humphrey, A. Dalke, K. Schulten, J. Mol. Graph., 1996, 14, 33-38.
